# Supplementary material for: Thrombin Is an Effective and Safe Therapy in the Management of Bleeding Gastric Varices. A Real-World Experience
Source: PubMed Central journal article supplement (PMC7920079; doi:10.3390/jcm10040785), 2021-02-16
Supplement: jcm-10-00785-s001.pdf [file jcm-10-00785-s001.pdf]

**Table S1: Admission platelet count (all groups)**

| <b>Patient group</b>                                |              | <b>Platelet count</b><br>Median (range $\pm$ SD) |
|-----------------------------------------------------|--------------|--------------------------------------------------|
| Cirrhosis                                           | Child-Pugh A | 118 (53–322, 62.1)                               |
|                                                     | Child-Pugh B | 110 (24–582, 90.2)                               |
|                                                     | Child-Pugh C | 98 (42–491, 88.2)                                |
| Non-cirrhotic portal HTN                            |              | 174 (46–407, 119.1)                              |
| No evidence portal HTN (gastric cancer) ( $n = 1$ ) |              | 349 (n/a)                                        |

|                        |                     |
|------------------------|---------------------|
| Gastric varices        | 107 (24–582, 102.8) |
| Oesophageal varices    | 87 (33–327, 85.8)   |
| EBL-induced ulceration | 117 (47–176, 31.5)  |
| Ectopic varices        | 146 (42–335, 92.2)  |
